# Supplementary material for: Significant Decrease in Annual Cancer Diagnoses in Spain during the COVID-19 Pandemic: A Real-Data Study
Source: MDPI journal article supplement (doi:10.3390/cancers13133215), 2021-06-28
Supplement: s1 [file s1]

**Table S1.** Monthly number of COVID-19 cases in Málaga

| <b>MONTH</b> | <b>No. COVID-19 cases</b> | <b>% change in cancer diagnoses 2019-2020</b> |
|--------------|---------------------------|-----------------------------------------------|
| MONTH 1      | 2,578                     | -30,4%                                        |
| MONTH 2      | 1,528                     | -15,2%                                        |
| MONTH 3      | 442                       | -20,7%                                        |
| MONTH 4      | 184                       | -4,7%                                         |
| MONTH 5      | 1,518                     | 7,1%                                          |
| MONTH 6      | 7,967                     | -19,0%                                        |
| MONTH 7      | 5,918                     | -4,8%                                         |
| MONTH 8      | 11,315                    | -14,5%                                        |
| MONTH 9      | 6,462                     | -17,1%                                        |
| MONTH 10     | 12,047                    | 4,6%                                          |
| MONTH 11     | 34,06                     | -36,7%                                        |
| MONTH 12     | 5,178                     | -49,3%                                        |

**Table S2.** Patients' characteristics 2018 and 2019

| <b>Characteristic</b> | <b>2018</b> | <b>2019</b> |
|-----------------------|-------------|-------------|
| <i>N</i>              | 2,840       | 2,825       |
| Age at diagnoses      |             |             |
| Median (range)        | 64 (14-97)  | 64 (17-100) |
| Gender                |             |             |
| Male                  | 1,334       | 1,324       |
| Female                | 1,506       | 1,501       |
| Early Stage           |             |             |
| 0-0 <sub>is</sub>     | 17          | 12          |
| I                     | 414         | 434         |
| II                    | 641         | 603         |
| TOTAL                 | 1,071       | 1,049       |
| Advanced Stage        |             |             |
| III                   | 617         | 623         |
| IV                    | 891         | 939         |
| Total                 | 1,508       | 1,562       |
| Unknown Stage         | 261         | 214         |

**Table S3.** Patients' characteristics 2017 and 2019

| <b>Characteristic</b> | <b>2017</b> | <b>2019</b> |
|-----------------------|-------------|-------------|
| <i>N</i>              | 2,909       | 2,825       |
| Age at diagnoses      |             |             |
| Median (range)        | 63 (15-94)  | 64 (17-100) |
| Gender                |             |             |
| Male                  | 1,398       | 1,324       |
| Female                | 1,511       | 1,501       |
| Early Stage           |             |             |
| 0-0 <sub>is</sub>     | 17          | 12          |
| I                     | 414         | 434         |
| II                    | 641         | 603         |
| TOTAL                 | 1,071       | 1,049       |
| Advanced Stage        |             |             |
| III                   | 617         | 623         |
| IV                    | 891         | 939         |
| Total                 | 1,508       | 1,562       |
| Unknown Stage         | 261         | 214         |

**Table S 4.** Neoplasms annual incidence and relative changes.

| Neoplasm                  | 2018  |         | 2019  |         | % Change |
|---------------------------|-------|---------|-------|---------|----------|
| Breast                    | 758   | (26,7%) | 746   | (26,4%) | 1,6%     |
| Lung                      | 498   | (17,5%) | 492   | (17,4%) | 1,2%     |
| Colorectal                | 493   | (17,4%) | 484   | (17,1%) | 1,9%     |
| Head and Neck             | 115   | (4,0%)  | 121   | (4,3%)  | -5,0%    |
| Hematologic               | 114   | (4,0%)  | 86    | (3,0%)  | 32,6%    |
| Pancreas                  | 101   | (3,6%)  | 91    | (3,2%)  | 11,0%    |
| Stomach                   | 82    | (2,9%)  | 77    | (2,7%)  | 6,5%     |
| Bladder                   | 76    | (2,7%)  | 70    | (2,5%)  | 8,6%     |
| Others                    | 71    | (2,5%)  | 64    | (2,3%)  | 10,9%    |
| Prostate                  | 66    | (2,3%)  | 61    | (2,2%)  | 8,2%     |
| Ovary                     | 61    | (2,1%)  | 69    | (2,4%)  | -11,6%   |
| Melanoma                  | 59    | (2,1%)  | 41    | (1,5%)  | 43,9%    |
| Sarcoma                   | 56    | (2,0%)  | 73    | (2,6%)  | -23,3%   |
| Esophagus                 | 38    | (1,3%)  | 52    | (1,8%)  | -26,9%   |
| Endometrium               | 37    | (1,3%)  | 37    | (1,3%)  | 0,0%     |
| Germ cells                | 36    | (1,3%)  | 33    | (1,2%)  | 9,1%     |
| CUP                       | 36    | (1,3%)  | 23    | (0,8%)  | 56,5%    |
| Cervix                    | 35    | (1,2%)  | 46    | (1,6%)  | -23,9%   |
| Gallbladder and bile duct | 33    | (1,2%)  | 61    | (2,2%)  | -45,9%   |
| Kidney                    | 29    | (1,0%)  | 37    | (1,3%)  | -21,6%   |
| CNS                       | 27    | (1,0%)  | 34    | (1,2%)  | -20,6%   |
| GIST                      | 13    | (0,5%)  | 15    | (0,5%)  | -13,3%   |
| Mesothelioma              | 6     | (0,2%)  | 12    | (0,4%)  | -50,0%   |
| TOTAL <sup>1</sup>        | 2,840 | (100%)  | 2,825 | (100%)  | 0,5%     |

<sup>1</sup>P=0,96. CUP: Cancer of unknown primary site GIST: Gastrointestinal stromal tumor CNS: central nervous system

**Table S5.** Neoplasms annual incidence and relative changes.

| Neoplasm                  | 2018  |         | 2019  |         | % Change |
|---------------------------|-------|---------|-------|---------|----------|
| Breast                    | 786   | (27,0%) | 746   | (26,4%) | 5,4%     |
| Lung                      | 505   | (17,4%) | 492   | (17,4%) | 2,6%     |
| Colorectal                | 480   | (16,5%) | 484   | (17,1%) | -0,8%    |
| Head and Neck             | 130   | (4,5%)  | 121   | (4,3%)  | 7,4%     |
| Prostate                  | 108   | (3,7%)  | 61    | (2,2%)  | 77,0%    |
| Pancreas                  | 92    | (3,2%)  | 91    | (3,2%)  | 1,1%     |
| Hematologic               | 85    | (2,9%)  | 86    | (3,0%)  | -1,2%    |
| Bladder                   | 79    | (2,7%)  | 70    | (2,5%)  | 12,9%    |
| Ovary                     | 68    | (2,3%)  | 69    | (2,4%)  | -1,4%    |
| Others                    | 67    | (2,3%)  | 64    | (2,3%)  | 4,7%     |
| Stomach                   | 65    | (2,2%)  | 77    | (2,7%)  | -15,6%   |
| Melanoma                  | 65    | (2,2%)  | 41    | (1,5%)  | 58,5%    |
| Sarcoma                   | 63    | (2,2%)  | 73    | (2,6%)  | -13,7%   |
| Esophagus                 | 49    | (1,7%)  | 52    | (1,8%)  | -5,8%    |
| Gallbladder and bile duct | 46    | (1,6%)  | 61    | (2,2%)  | -24,6%   |
| Cervix                    | 43    | (1,5%)  | 46    | (1,6%)  | -6,5%    |
| CUP                       | 37    | (1,3%)  | 23    | (0,8%)  | 60,9%    |
| Germ cells                | 36    | (1,2%)  | 33    | (1,2%)  | 9,1%     |
| Kidney                    | 35    | (1,2%)  | 37    | (1,3%)  | -5,4%    |
| Endometrium               | 30    | (1,0%)  | 37    | (1,3%)  | -18,9%   |
| CNS                       | 28    | (1,0%)  | 34    | (1,2%)  | -17,6%   |
| Mesothelioma              | 10    | (0,3%)  | 12    | (0,4%)  | -16,7%   |
| GIST                      | 2     | (0,1%)  | 15    | (0,5%)  | -86,7%   |
| TOTAL <sup>1</sup>        | 2,909 | (100%)  | 2,825 | (100%)  | 3,0%     |

<sup>1</sup>P=0,68. CUP: Cancer of unknown primary site GIST: Gastrointestinal stromal tumor CNS: central nervous system

Figure- S1: Comparative of monthly new diagnosis of all tumor sites between 2018 and 2019

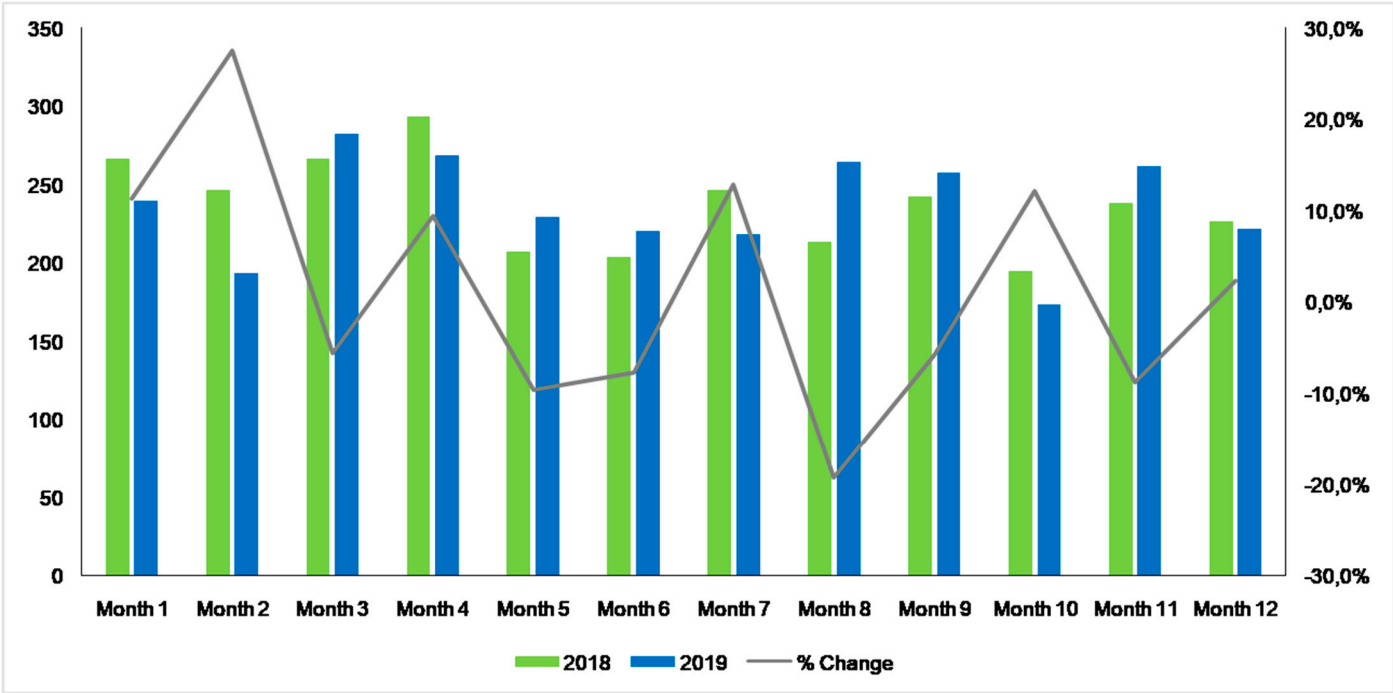

Figure- S2: Comparative of monthly new diagnosis of all tumor sites between 2017 and 2019

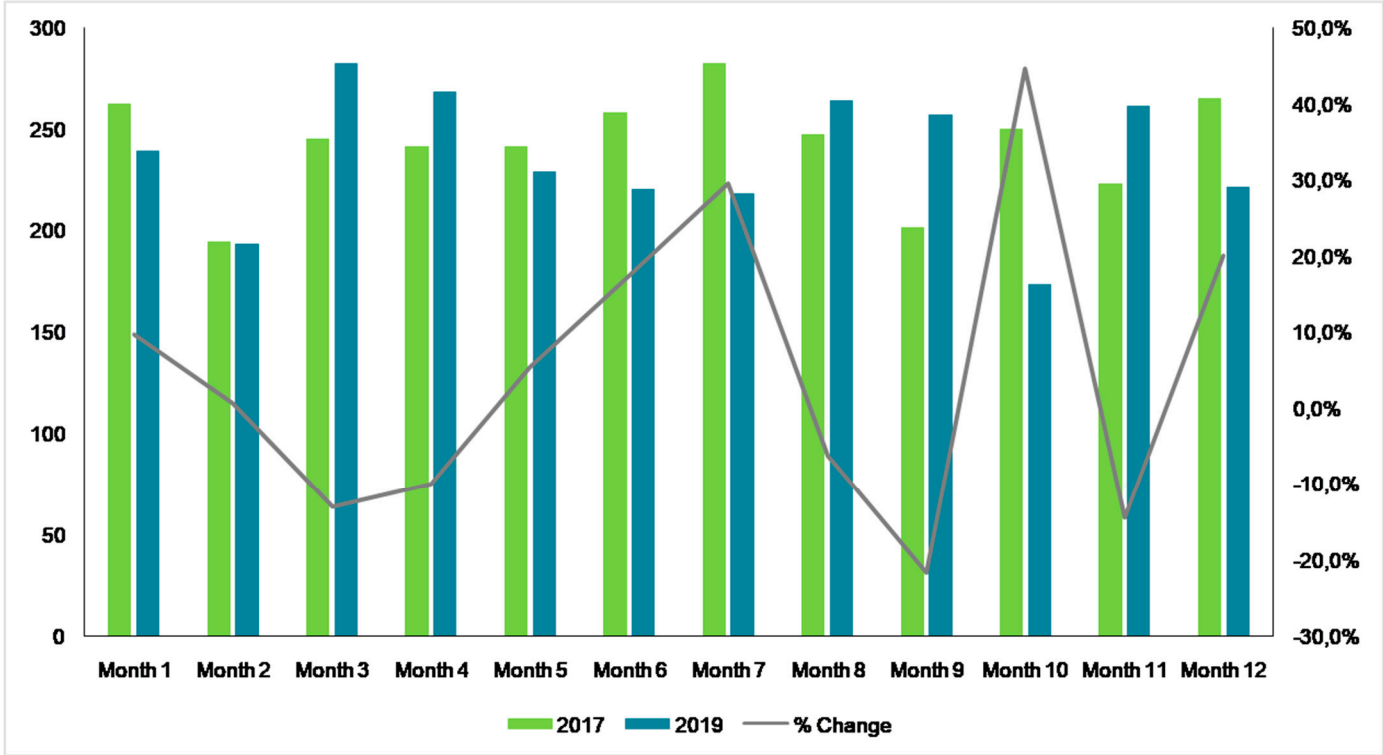

Figure S3. Comparison of early and advanced stages in the ten most frequent neoplasms between 2018 and 2019

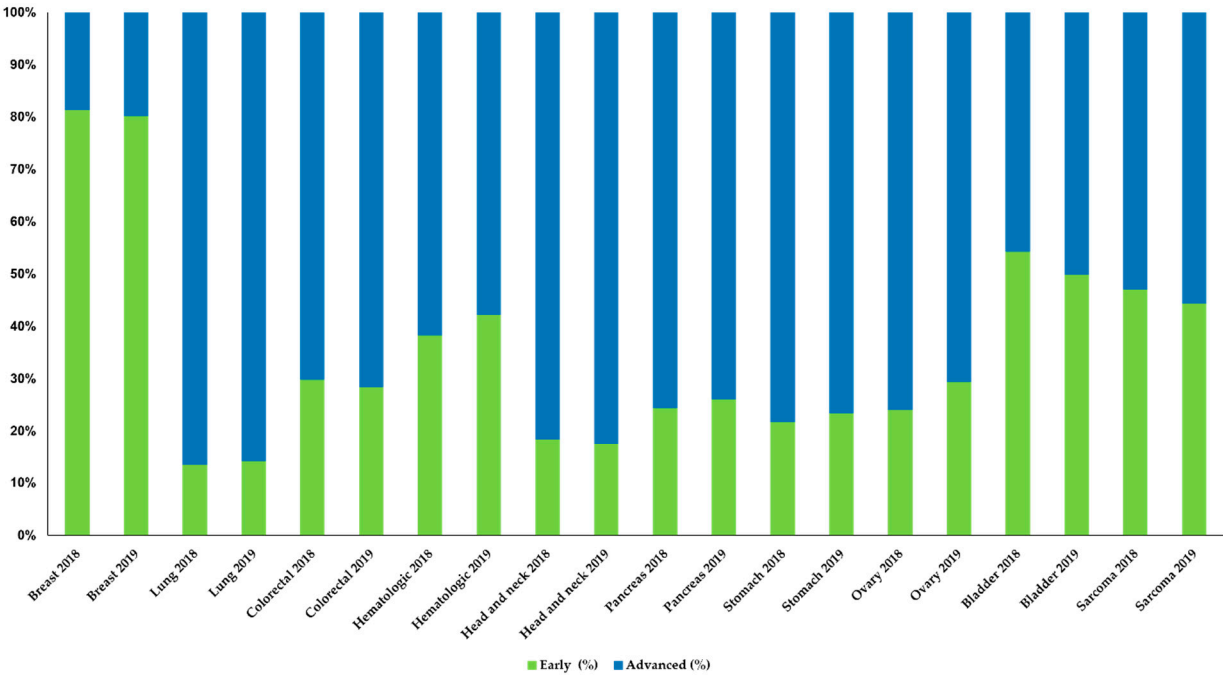

Figure S4. Comparison of early and advanced stages in the ten most frequent neoplasms between 2017 and 2019

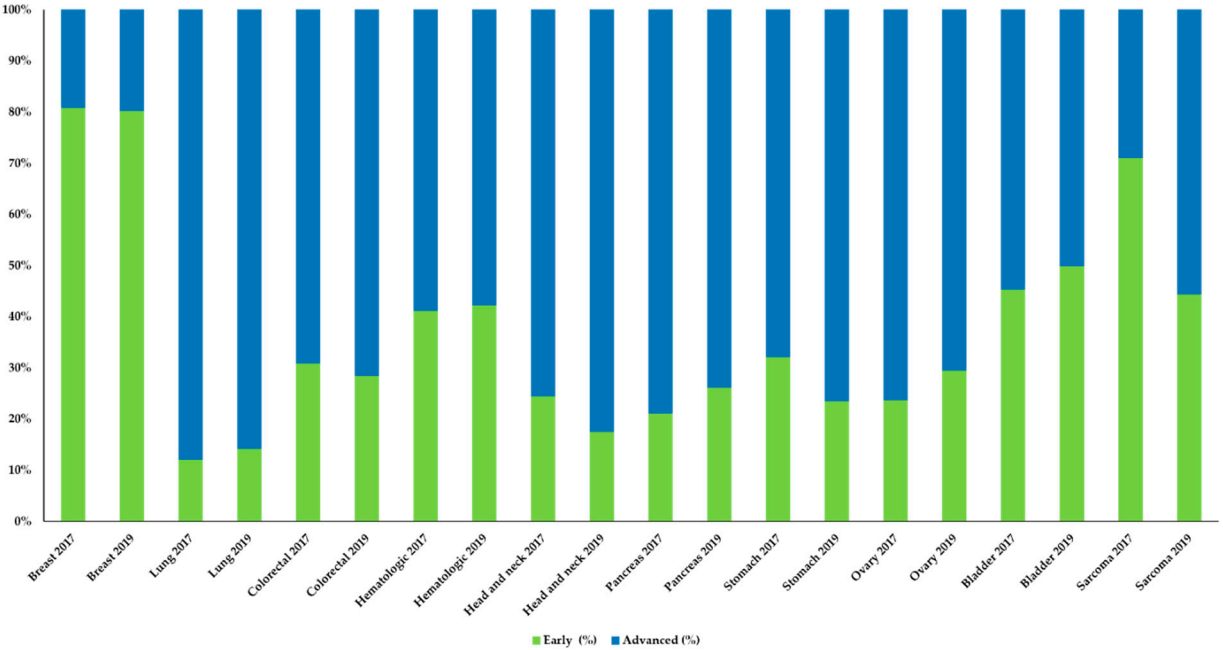

**Table S6.** Annual distribution of tumor stages 2018 and 2019

| NEOPLASIAS                | Early<br>2018 | Early<br>2018 (%) | Early<br>2019 | Early<br>2019 (%) | Advanced<br>2018 | Advanced<br>2018 (%) | Advanced<br>2019 | Advanced<br>2019 (%) |
|---------------------------|---------------|-------------------|---------------|-------------------|------------------|----------------------|------------------|----------------------|
| Breast                    | 586           | 81,4%             | 587           | 80,3%             | 134              | 18,6%                | 144              | 19,7%                |
| Lung                      | 65            | 13,5%             | 69            | 14,2%             | 415              | 86,5%                | 416              | 85,8%                |
| Colorectal                | 143           | 30,0%             | 135           | 28,5%             | 334              | 70,0%                | 339              | 71,5%                |
| Hematologic               | 38            | 38,4%             | 33            | 42,3%             | 61               | 61,6%                | 45               | 57,7%                |
| Head and neck             | 18            | 18,6%             | 19            | 17,6%             | 79               | 81,4%                | 89               | 82,4%                |
| Pancreas                  | 23            | 24,5%             | 22            | 26,2%             | 71               | 75,5%                | 62               | 73,8%                |
| Ovary                     | 13            | 24,1%             | 18            | 29,5%             | 41               | 75,9%                | 43               | 70,5%                |
| Stomach                   | 17            | 21,8%             | 16            | 23,5%             | 61               | 78,2%                | 52               | 76,5%                |
| Bladder                   | 31            | 54,4%             | 31            | 50,0%             | 26               | 45,6%                | 31               | 50,0%                |
| Esophagus                 | 3             | 11,1%             | 9             | 20,0%             | 24               | 88,9%                | 36               | 80,0%                |
| Gallbladder and bile duct | 8             | 27,6%             | 7             | 12,7%             | 21               | 72,4%                | 48               | 87,3%                |
| Cervix                    | 20            | 57,1%             | 22            | 48,9%             | 15               | 42,9%                | 23               | 51,1%                |
| Prostate                  | 8             | 13,3%             | 4             | 7,3%              | 52               | 86,7%                | 51               | 92,7%                |
| Melanoma                  | 12            | 27,9%             | 4             | 10,5%             | 31               | 72,1%                | 34               | 89,5%                |
| Sarcoma                   | 17            | 47,2%             | 16            | 44,4%             | 19               | 52,8%                | 20               | 55,6%                |
| Germ cells                | 31            | 93,9%             | 25            | 92,6%             | 2                | 6,1%                 | 2                | 7,4%                 |
| Endometrium               | 11            | 32,4%             | 11            | 30,6%             | 23               | 67,6%                | 25               | 69,4%                |
| Others                    | 13            | 27,1%             | 10            | 20,0%             | 35               | 72,9%                | 40               | 80,0%                |
| Kidney                    | 8             | 28,6%             | 5             | 14,3%             | 20               | 71,4%                | 30               | 85,7%                |
| CUP                       | 0             | 0,0%              | 0             | 0,0%              | 36               | 100,0%               | 23               | 100,0%               |
| GIST                      | 5             | 50,0%             | 6             | 60,0%             | 5                | 50,0%                | 4                | 40,0%                |
| Mesothelioma              | 1             | 25,0%             | 0             | 0,0%              | 3                | 75,0%                | 7                | 100,0%               |

*P*=non-significant**Table S7.** Annual distribution of tumor stages 2017 and 2019

| NEOPLASIAS                | Early<br>2017 | Early<br>2017 (%) | Early<br>2019 | Early<br>2019 (%) | Advanced<br>2017 | Advanced<br>2017 (%) | Advanced<br>2019 | Advanced<br>2019 (%) |
|---------------------------|---------------|-------------------|---------------|-------------------|------------------|----------------------|------------------|----------------------|
| Breast                    | 601           | 80,9%             | 587           | 80,3%             | 142              | 19,1%                | 144              | 19,7%                |
| Lung                      | 58            | 12,2%             | 69            | 14,2%             | 418              | 87,8%                | 416              | 85,8%                |
| Colorectal                | 142           | 30,9%             | 135           | 28,5%             | 317              | 69,1%                | 339              | 71,5%                |
| Hematologic               | 28            | 41,2%             | 33            | 42,3%             | 40               | 58,8%                | 45               | 57,7%                |
| Head and neck             | 29            | 24,6%             | 19            | 17,6%             | 89               | 75,4%                | 89               | 82,4%                |
| Pancreas                  | 18            | 21,2%             | 22            | 26,2%             | 67               | 78,8%                | 62               | 73,8%                |
| Ovary                     | 15            | 23,8%             | 18            | 29,5%             | 48               | 76,2%                | 43               | 70,5%                |
| Stomach                   | 19            | 32,2%             | 16            | 23,5%             | 40               | 67,8%                | 52               | 76,5%                |
| Bladder                   | 30            | 45,5%             | 31            | 50,0%             | 36               | 54,5%                | 31               | 50,0%                |
| Esophagus                 | 13            | 28,9%             | 9             | 20,0%             | 32               | 71,1%                | 36               | 80,0%                |
| Gallbladder and bile duct | 4             | 12,9%             | 7             | 12,7%             | 27               | 87,1%                | 48               | 87,3%                |
| Cervix                    | 26            | 61,9%             | 22            | 48,9%             | 16               | 38,1%                | 23               | 51,1%                |
| Prostate                  | 13            | 13,7%             | 4             | 7,3%              | 82               | 86,3%                | 51               | 92,7%                |
| Melanoma                  | 20            | 35,7%             | 4             | 10,5%             | 36               | 64,3%                | 34               | 89,5%                |
| Sarcoma                   | 32            | 71,1%             | 16            | 44,4%             | 13               | 28,9%                | 20               | 55,6%                |
| Germ cells                | 33            | 91,7%             | 25            | 92,6%             | 3                | 8,3%                 | 2                | 7,4%                 |
| Endometrium               | 12            | 42,9%             | 11            | 30,6%             | 16               | 57,1%                | 25               | 69,4%                |
| Others                    | 9             | 19,1%             | 10            | 20,0%             | 38               | 80,9%                | 40               | 80,0%                |
| Kidney                    | 6             | 20,0%             | 5             | 14,3%             | 24               | 80,0%                | 30               | 85,7%                |
| CUP                       | 1             | 2,8%              | 0             | 0,0%              | 35               | 97,2%                | 23               | 100,0%               |
| GIST                      | 5             | 83,3%             | 6             | 60,0%             | 1                | 16,7%                | 4                | 40,0%                |
| Mesothelioma              | 2             | 22,2%             | 0             | 0,0%              | 7                | 77,8%                | 7                | 100,0%               |

*P*=non-significant
